# Supplementary material
Source: PubMed Central journal article supplement (PMC5131806)
Supplement: NIHMS826428-supplement.pdf [file NIHMS826428-supplement.pdf]

**APPENDIX A:**

Table 1: Path coefficients from path analysis models for lung function at age 10 years

|                                   |          | FEV <sub>1</sub> |          |        | FVC    |          |        | FEV <sub>1</sub> /FVC |          |        | FEF <sub>25-75</sub> |          |        |
|-----------------------------------|----------|------------------|----------|--------|--------|----------|--------|-----------------------|----------|--------|----------------------|----------|--------|
|                                   |          | Direct           | Indirect | Total  | Direct | Indirect | Total  | Direct                | Indirect | Total  | Direct               | Indirect | Total  |
| Birth weight                      | Estimate | 0.08             | 0.15     | 0.22   | 0.04   | 0.16     | 0.20   | 0.06                  | -0.04    | 0.02   | 0.10                 | 0.07     | 0.17   |
|                                   | SE       | 0.02             | 0.02     | 0.03   | 0.02   | 0.02     | 0.03   | 0.03                  | 0.01     | 0.03   | 0.03                 | 0.01     | 0.03   |
|                                   | P-value  | 0.0014           | <.0001   | <.0001 | 0.0729 | <.0001   | <.0001 | 0.0594                | <.0001   | 0.5181 | 0.0001               | <.0001   | <.0001 |
| Maternal smoking during pregnancy | Estimate | -0.003           | -0.03    | -0.04  | -0.01  | -0.03    | -0.03  | 0.02                  | -0.01    | 0.00   | -0.03                | -0.03    | -0.06  |
|                                   | SE       | 0.02             | 0.02     | 0.03   | 0.02   | 0.02     | 0.03   | 0.03                  | 0.01     | 0.03   | 0.03                 | 0.01     | 0.03   |
|                                   | P-value  | 0.9054           | 0.1092   | 0.2397 | 0.6959 | 0.2422   | 0.2577 | 0.593                 | 0.0946   | 0.9214 | 0.2711               | 0.0092   | 0.0471 |
| Sex                               | Estimate | -0.10            | -0.005   | -0.11  | -0.18  | 0.01     | -0.18  | 0.19                  | -0.02    | 0.16   | 0.10                 | -0.01    | 0.09   |
|                                   | SE       | 0.02             | 0.02     | 0.03   | 0.02   | 0.02     | 0.03   | 0.03                  | 0.01     | 0.03   | 0.03                 | 0.01     | 0.03   |
|                                   | P-value  | <.0001           | 0.8131   | 0.0003 | <.0001 | 0.8179   | <.0001 | <.0001                | 0.0085   | <.0001 | 0.0006               | 0.1847   | 0.0044 |
| Gestational age                   | Estimate |                  | 0.09     | 0.09   |        | 0.08     | 0.08   |                       | 0.01     | 0.01   |                      | 0.07     | 0.07   |
|                                   | SE       |                  | 0.02     | 0.02   |        | 0.02     | 0.02   |                       | 0.01     | 0.01   |                      | 0.02     | 0.02   |
|                                   | P-value  |                  | <.0001   | <.0001 |        | <.0001   | <.0001 |                       | 0.477    | 0.477  |                      | <.0001   | <.0001 |
| Height at 10 years                | Estimate | 0.60             |          | 0.6    | 0.62   |          | 0.62   | -0.06                 |          | -0.06  | 0.30                 |          | 0.30   |
|                                   | SE       | 0.03             |          | 0.03   | 0.03   |          | 0.03   | 0.04                  |          | 0.04   | 0.03                 |          | 0.03   |
|                                   | P-value  | <.0001           |          | <.0001 | <.0001 |          | <.0001 | 0.2007                |          | 0.2007 | <.0001               |          | <.0001 |
| Weight at 10 years                | Estimate | 0.07             | 0.5115   | 0.56   | 0.12   | 0.53     | 0.65   | -0.14                 | -0.05    | -0.18  |                      | 0.25     | 0.25   |
|                                   | SE       | 0.03             | 0.92     | 0.93   | 0.03   | 0.93     | 0.93   | 0.04                  | 0.10     | 0.09   |                      | 0.47     | 0.47   |
|                                   | P-value  | 0.0224           | 1        | 0.9999 | <.0001 | 0.5713   | 0.4836 | 0.0016                | 0.625    | 0.052  |                      | 0.5877   | 0.5877 |

Goodness of Fit Criteria:

FEV<sub>1</sub>: Chi-squared test statistic=10.0, p-value=0.07; AGFI=0.97; CFI=0.99; RMSEA=0.03

FVC: Chi-squared test statistic=10.1, p-value=0.07; AGFI=0.97; CFI=0.99; RMSEA=0.03

FEV<sub>1</sub>/FVC: Chi-squared test statistic=11.0, p-value=0.05; AGFI=0.97; CFI=0.99; RMSEA=0.03

FEF<sub>25-75</sub>: Chi-squared test statistic=11.7, p-value=0.16; AGFI=0.98; CFI=0.99; RMSEA=0.01

Table 2: Path coefficients from path analysis models for lung function at age 18 years

|                                                                                    |          | FEV <sub>1</sub> |          |          | FVC    |          |        | FEV <sub>1</sub> /FVC |          |        | FEF <sub>25-75</sub> |          |        |
|------------------------------------------------------------------------------------|----------|------------------|----------|----------|--------|----------|--------|-----------------------|----------|--------|----------------------|----------|--------|
|                                                                                    |          | Direct           | Indirect | Total    | Direct | Indirect | Total  | Direct                | Indirect | Total  | Direct               | Indirect | Total  |
| Birth weight                                                                       | Estimate | -0.01            | 0.16     | 0.15     | 0.01   | 0.15     | 0.16   | -0.05                 | 0.00     | -0.05  | -0.03                | 0.12     | 0.09   |
|                                                                                    | SE       | 0.02             | 0.02     | 0.02     | 0.02   | 0.02     | 0.02   | 0.03                  | 0.02     | 0.03   | 0.03                 | 0.02     | 0.03   |
|                                                                                    | P-value  | 0.6301           | <.0001   | <.0001   | 0.6557 | <.0001   | <.0001 | 0.1510                | 0.8702   | 0.1502 | 0.2754               | <.0001   | 0.0015 |
| Maternal smoking during pregnancy                                                  | Estimate | -0.01            | -0.03    | -0.04    | 0.03   | -0.03    | 0.01   | -0.10                 | 0.00     | -0.10  | -0.05                | -0.04    | -0.09  |
|                                                                                    | SE       | 0.02             | 0.02     | 0.02     | 0.02   | 0.02     | 0.02   | 0.03                  | 0.02     | 0.03   | 0.02                 | 0.02     | 0.03   |
|                                                                                    | P-value  | 0.6450           | 0.0997   | 0.1169   | 0.0311 | 0.1155   | 0.7062 | 0.0010                | 0.8725   | 0.0035 | 0.0374               | 0.0441   | 0.0023 |
| Sex                                                                                | Estimate | -0.34            | -0.38    | -0.71    | -0.27  | -0.45    | -0.72  | -0.11                 | 0.21     | 0.10   | -0.37                | -0.08    | -0.45  |
|                                                                                    | SE       | 0.03             | 0.02     | 0.02     | 0.03   | 0.02     | 0.01   | 0.05                  | 0.04     | 0.03   | 0.04                 | 0.04     | 0.03   |
|                                                                                    | P-value  | <.0001           | <.0001   | <.0001   | <.0001 | <.0001   | <.0001 | 0.0276                | <.0001   | 0.0029 | <.0001               | 0.0267   | <.0001 |
| FEV <sub>1</sub> or FVC or FEV <sub>1</sub> /FVC or FEF <sub>25-75</sub> at age 10 | Estimate | 0.51             |          | 0.51     | 0.50   |          | 0.50   | 0.54                  |          | 0.54   | 0.59                 |          | 0.59   |
|                                                                                    | SE       | 0.02             |          | 0.02     | 0.02   |          | 0.02   | 0.03                  |          | 0.03   | 0.02                 |          | 0.02   |
|                                                                                    | P-value  | <.0001           |          | <.0001   | <.0001 |          | <.0001 | <.0001                |          | <.0001 | <.0001               |          | <.0001 |
| Gestational age                                                                    | Estimate |                  | 0.04     | 0.04     |        | 0.04     | 0.04   |                       | -0.02    | -0.02  |                      | 0.03     | 0.03   |
|                                                                                    | SE       |                  | 0.01     | 0.01     |        | 0.01     | 0.01   |                       | 0.02     | 0.02   |                      | 0.01     | 0.01   |
|                                                                                    | P-value  |                  | 0.0094   | 0.0094   |        | 0.0048   | 0.0048 |                       | 0.2619   | 0.2619 |                      | 0.0649   | 0.0649 |
| Height at 10 years                                                                 | Estimate | -0.27            | 2.21     | 1.95     | -0.30  | 2.32     | 2.03   | 0.06                  | -0.32    | -0.25  | -0.09                | 1.00     | 0.90   |
|                                                                                    | SE       | 0.04             | 2.28     | 2.28     | 0.04   | 2.40     | 2.40   | 0.06                  | 0.43     | 0.41   | 0.03                 | 0.99     | 0.98   |
|                                                                                    | P-value  | <.0001           | 0.3318   | 0.3934   | <.0001 | 0.3338   | 0.3988 | 0.2912                | 0.4650   | 0.5370 | 0.0071               | 0.3122   | 0.3576 |
| Height at 18 years                                                                 | Estimate | 0.45             |          | 0.45     | 0.47   |          | 0.47   | -0.07                 |          | -0.07  | 0.20                 |          | 0.20   |
|                                                                                    | SE       | 0.03             |          | 0.03     | 0.03   |          | 0.03   | 0.06                  |          | 0.06   | 0.05                 |          | 0.05   |
|                                                                                    | P-value  | <.0001           |          | <.0001   | <.0001 |          | <.0001 | 0.2858                |          | 0.2858 | <.0001               |          | <.0001 |
| Weight at 10 years                                                                 | Estimate | -0.01            | 0.52     | 0.50     | -0.05  | 0.60     | 0.55   | 0.13                  | -0.27    | -0.14  |                      | 0.25     | 0.25   |
|                                                                                    | SE       | 0.03             | 27893.00 | 27893.00 | 0.03   | 2.90     | 2.90   | 0.06                  | 0.12     | 0.12   |                      | 1.42     | 1.42   |
|                                                                                    | P-value  | 0.6602           | 1.0000   | 1.0000   | 0.1362 | 0.8356   | 0.8486 | 0.0315                | 0.0261   | 0.2384 |                      | 0.8614   | 0.8614 |
| Weight at 18 years                                                                 | Estimate | 0.04             | 0.08     | 0.12     | 0.11   | 0.09     | 0.19   | -0.19                 | -0.01    | -0.20  |                      | 0.04     | 0.04   |
|                                                                                    | SE       | 0.03             | 0.88     | 0.88     | 0.03   | 0.92     | 0.92   | 0.05                  | 0.14     | 0.14   |                      | 0.38     | 0.38   |
|                                                                                    | P-value  | 0.1258           | 0.9247   | 0.8880   | <.0001 | 0.9238   | 0.8340 | <.0001                | 0.9277   | 0.1554 |                      | 0.9275   | 0.9275 |
